# Supplementary material for: Secondhand Smoke Correlates with Elevated Neutrophil-Lymphocyte Ratio and Has a Synergistic Effect with Physical Inactivity on Increasing Susceptibility to Type 2 Diabetes Mellitus: A Community-Based Case Control Study
Source: MDPI journal article supplement (doi:10.3390/ijerph17165696), 2020-08-06
Supplement: s1 [file s1]

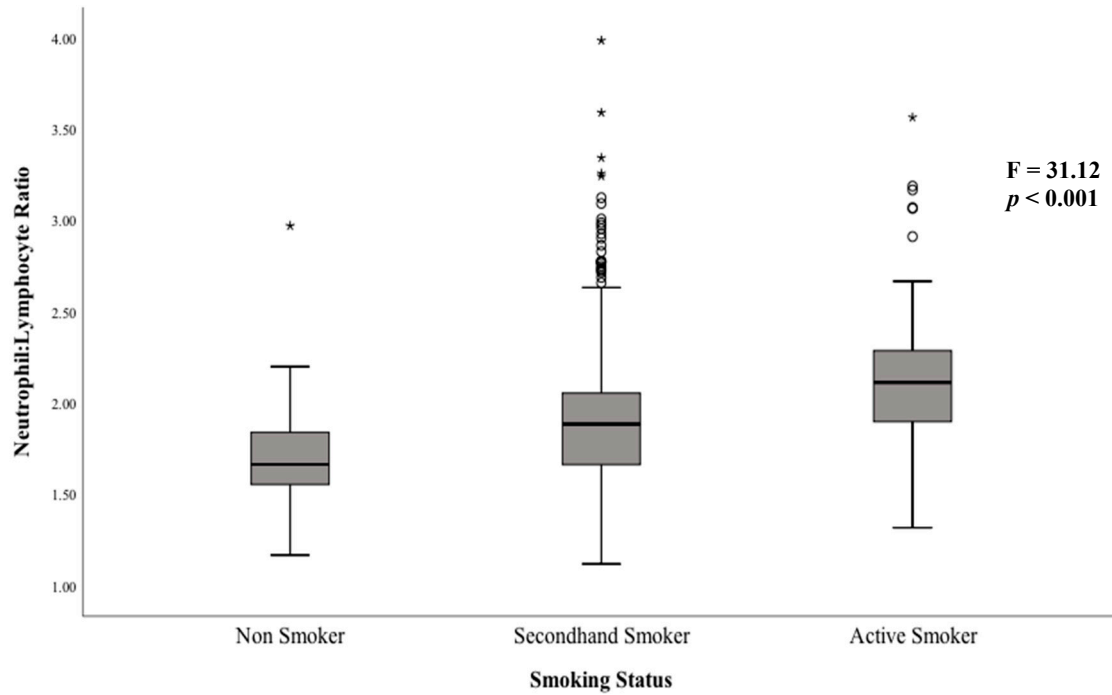

(a)

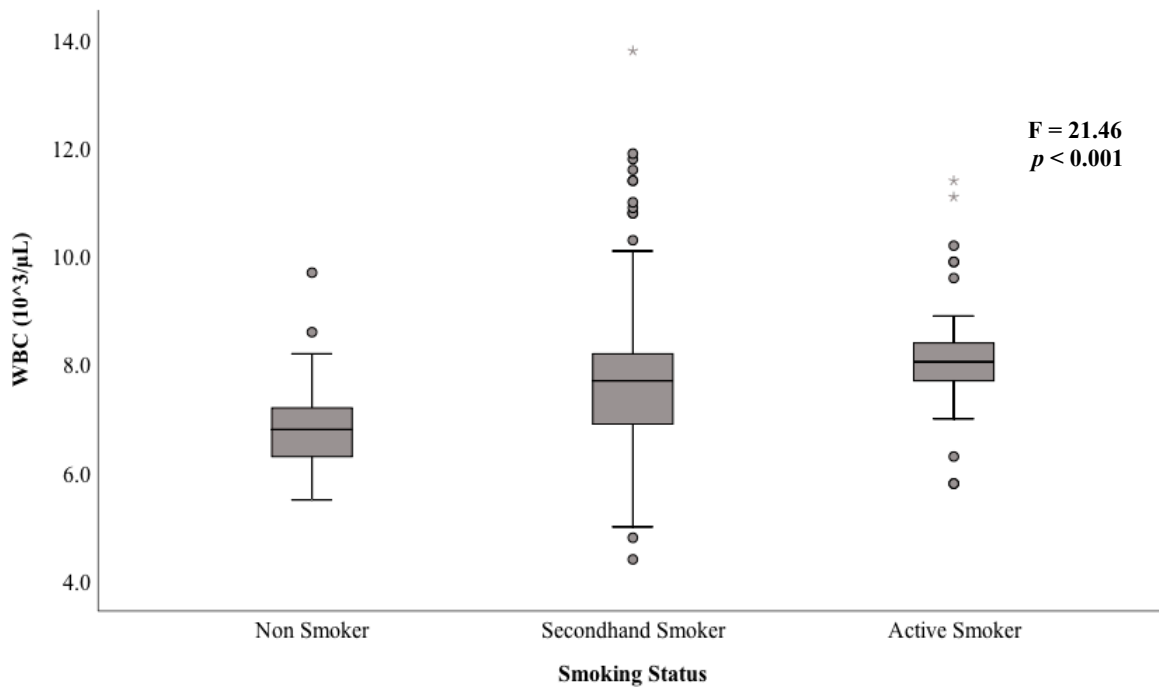

(b)

**Figure 1.** Correlation between smoking status (nonsmokers, those exposed to secondhand smoke, or active smokers) and (a) neutrophil-lymphocyte ratio (NLR); (b) white blood cell count (WBC), an inflammatory-biomarkers ( $n = 588$ ).

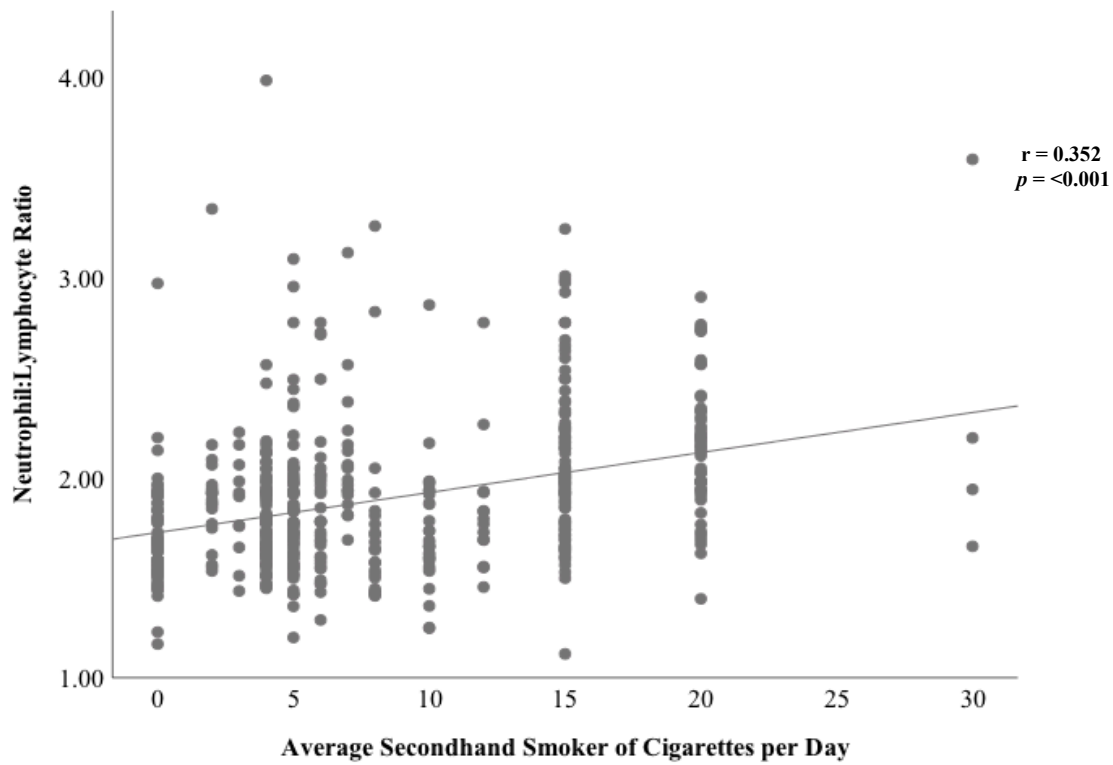

(a)

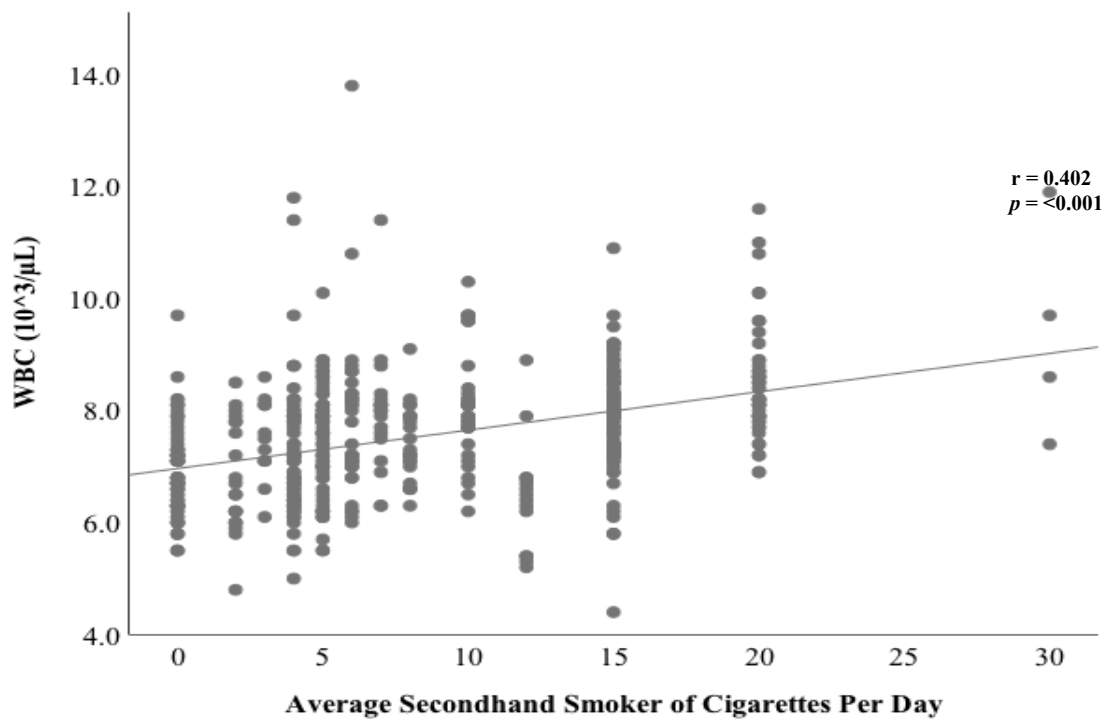

(b)

**Figure S2.** Correlation between average daily exposure to secondhand smoke (number of cigarettes) and (a) neutrophil–lymphocyte ratio; (b) white blood cell count (WBC), an inflammatory-biomarkers ( $n = 538$ ).

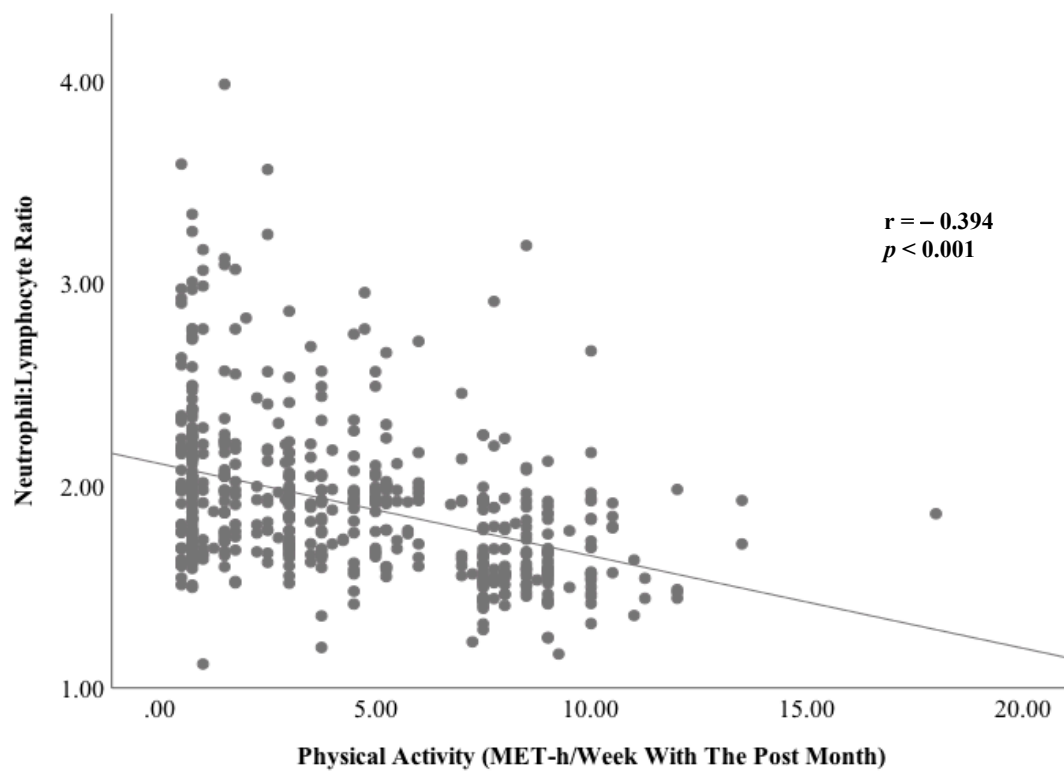

(a)

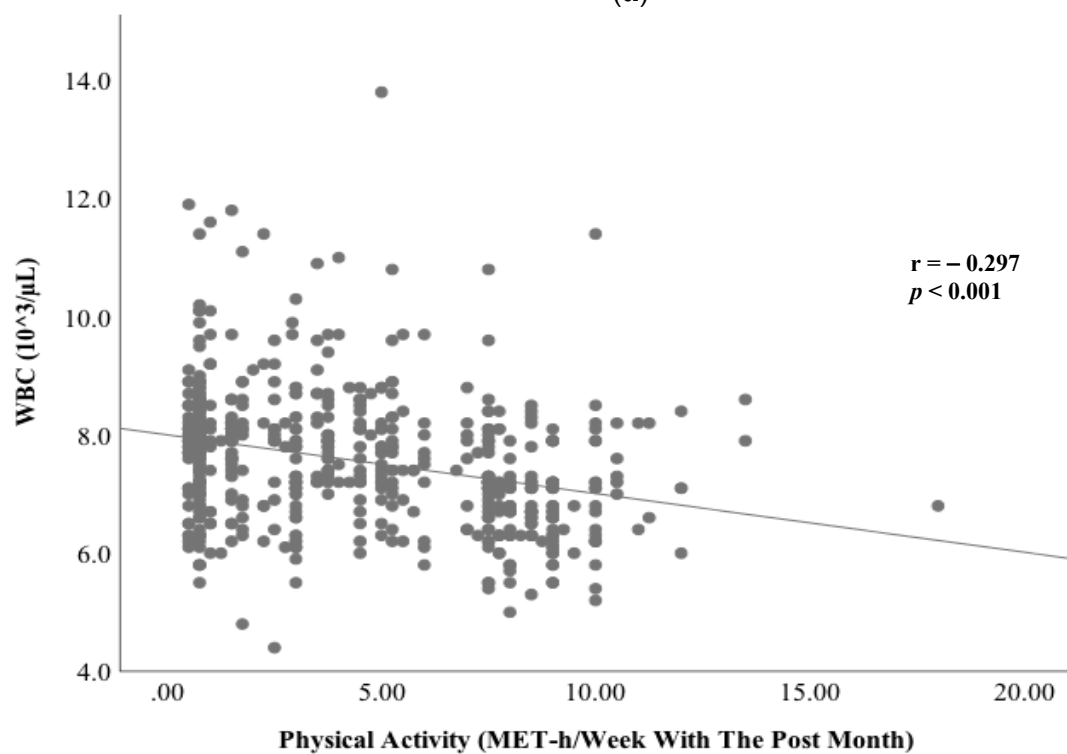

(b)

**Figure S3.** Correlation between physical activity (metabolic equivalent of task [MET]-h/week in previous month) and (a) neutrophil–lymphocyte ratio; (b) white blood cell count (WBC), an inflammatory-biomarkers ( $n = 538$ ).
